# Supplementary material for: Glypican-1 and glycoprotein 2 bearing extracellular vesicles do not discern pancreatic cancer from benign pancreatic diseases
Source: PubMed Central journal article supplement (PMC6383691; doi:10.18632/oncotarget.26620), 2019-02-01
Supplement: oncotarget-10-1045-s001.pdf [file oncotarget-10-1045-s001.pdf]

## Glypican-1 and glycoprotein 2 bearing extracellular vesicles do not discern pancreatic cancer from benign pancreatic diseases

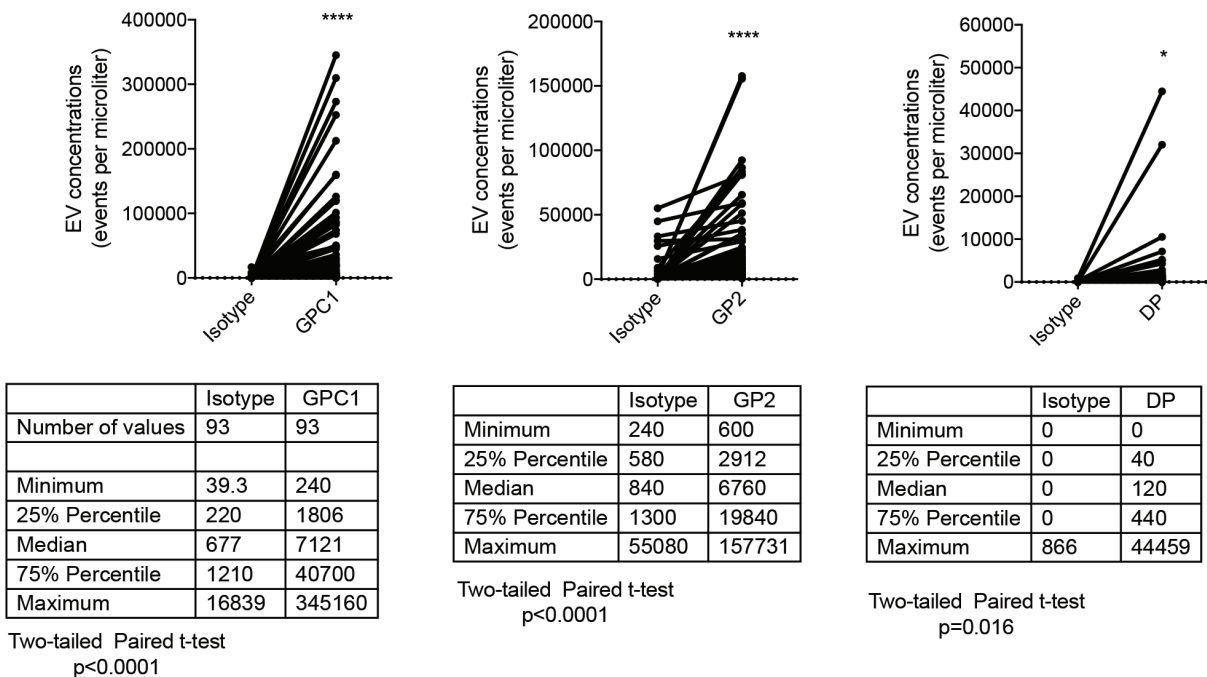

**Supplementary Figure 1: Nanoscale flow cytometric evaluation and results of isotype stained plasma samples.** Corresponding isotype values are listed for each patient plasma sample analyzed. Each table lists the results generated for each biomarker-isotype pair.

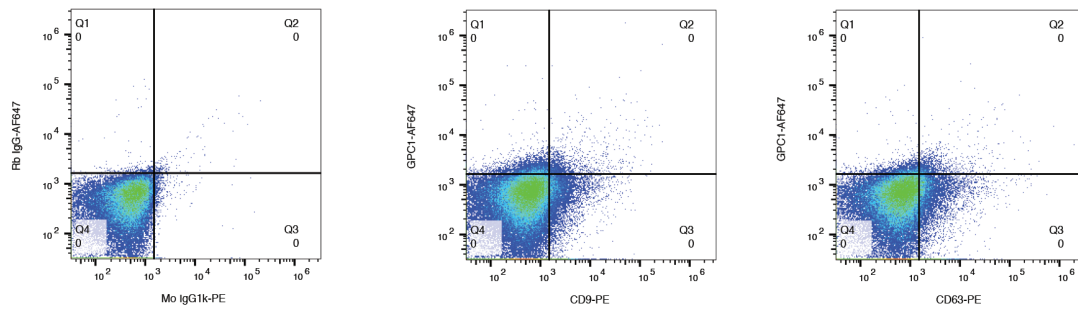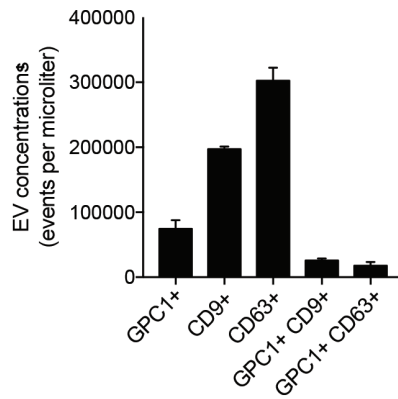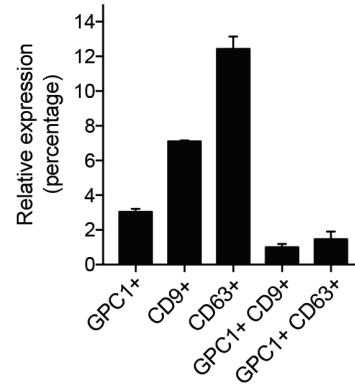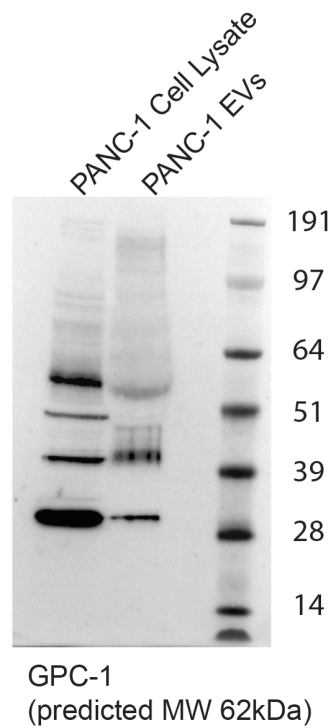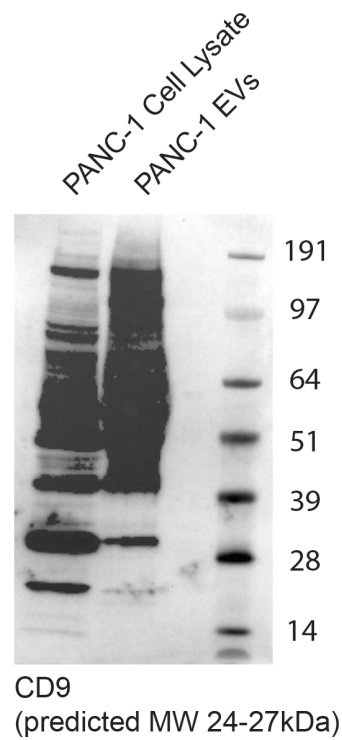

**Supplementary Figure 2: Nanoscale flow cytometry (top and middle panels) and Western Immunoblot analysis of PANC-1 cells.** GPC1 and CD9 expression on EVs released by PANC-1 cells was observed and quantitated (top and middle panels). Western immunoblot analysis confirmed the true EV origin of GPC1-positive EVs. As expected, GPC1- and CD9-positive EVs are detected by both techniques. The presence of GPC1+ CD9- EVs and GPC1- CD9+ EVs in PANC-1 culture media was also observed (bottom panel).
